# Supplementary material
Source: PubMed Central journal article supplement (PMC4113420)
Supplement: NIHMS601530-supplement-01.pdf [file NIHMS601530-supplement-01.pdf]

## Supplemental Figure 1

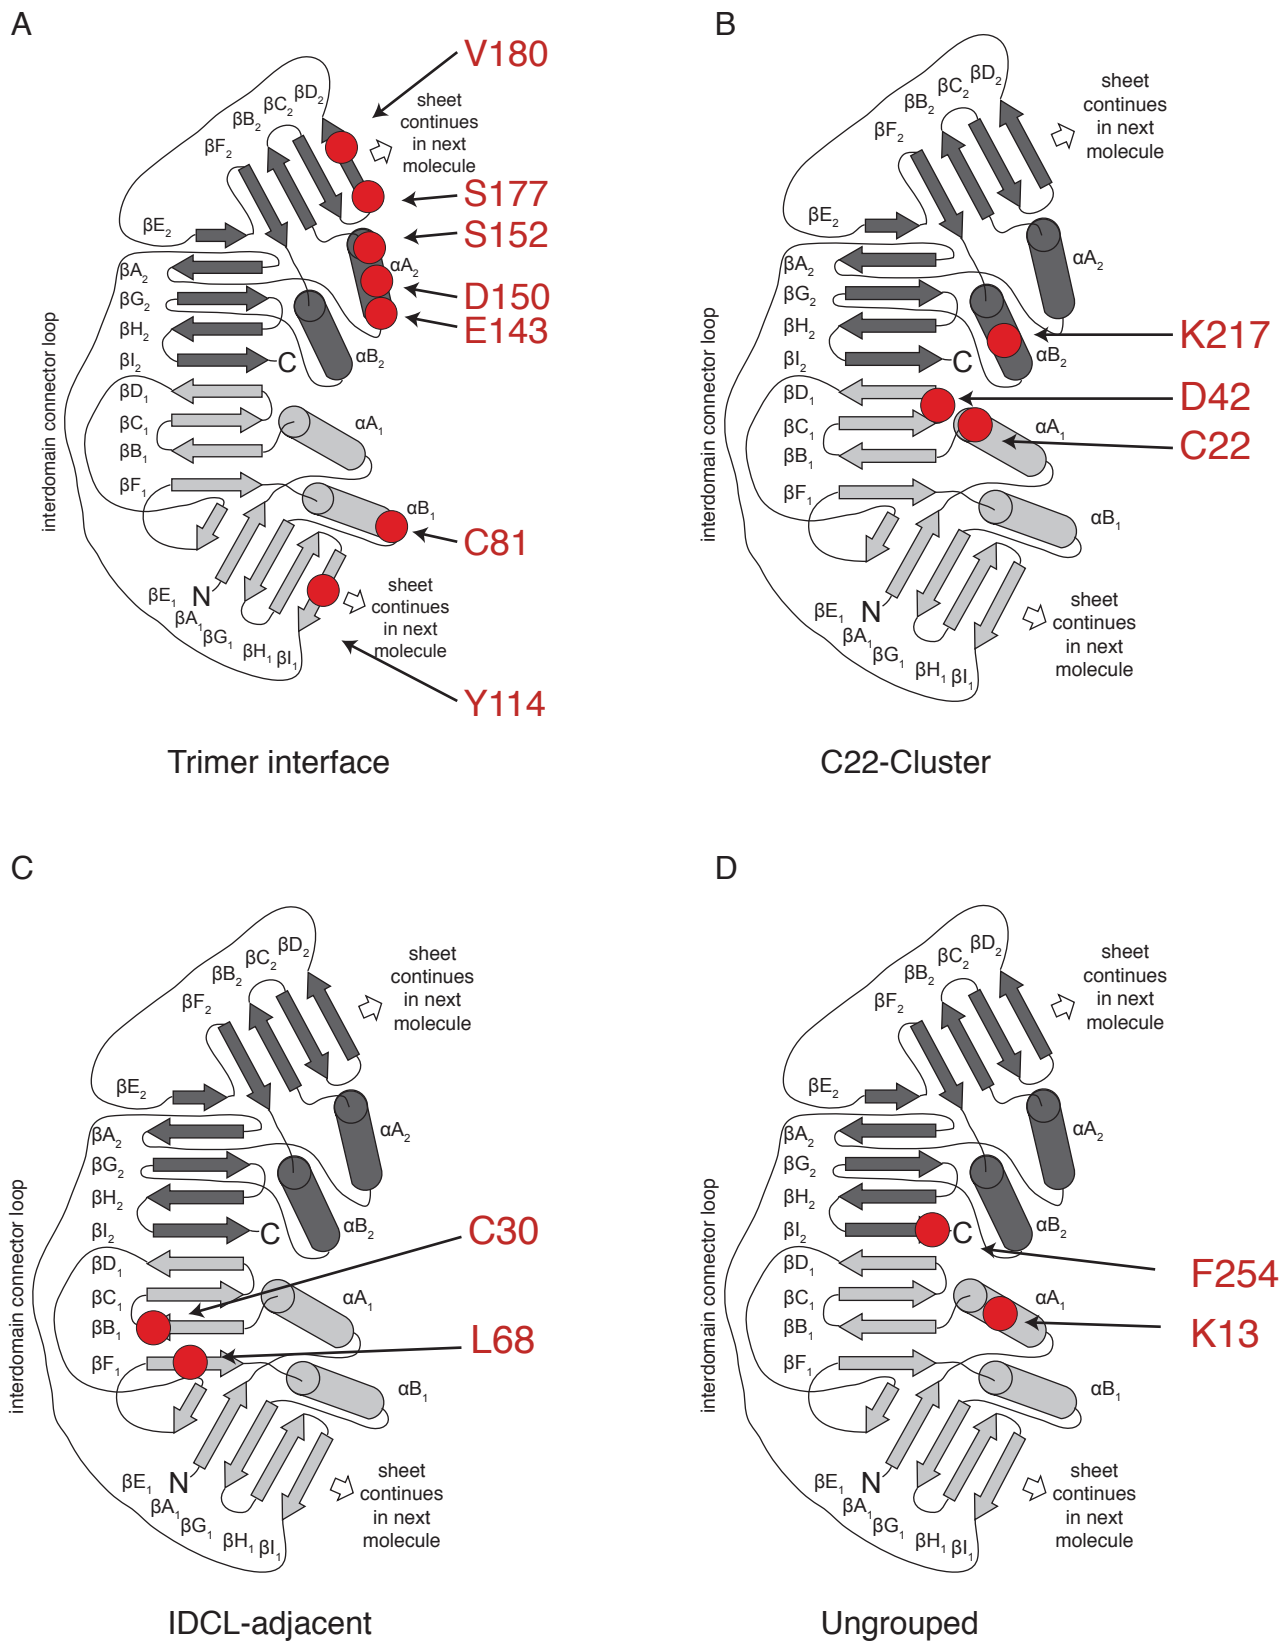

## Supplemental Figure 2

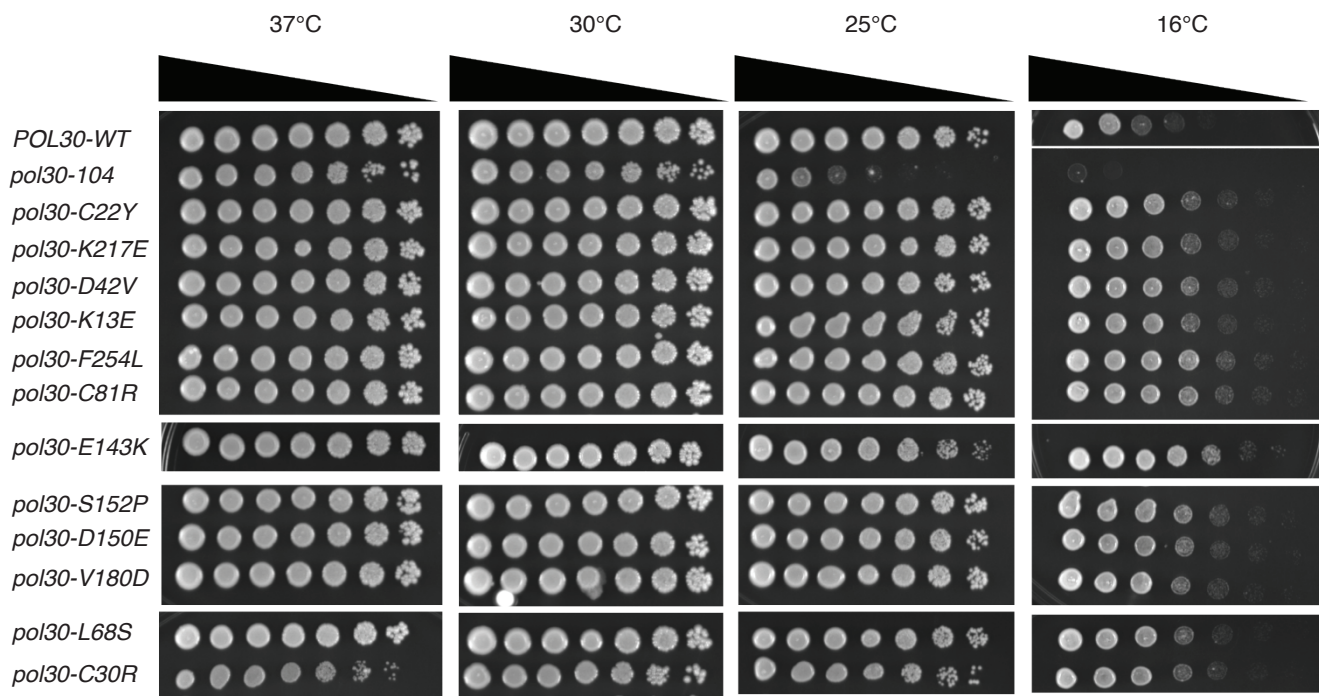

Supplemental Figure 3

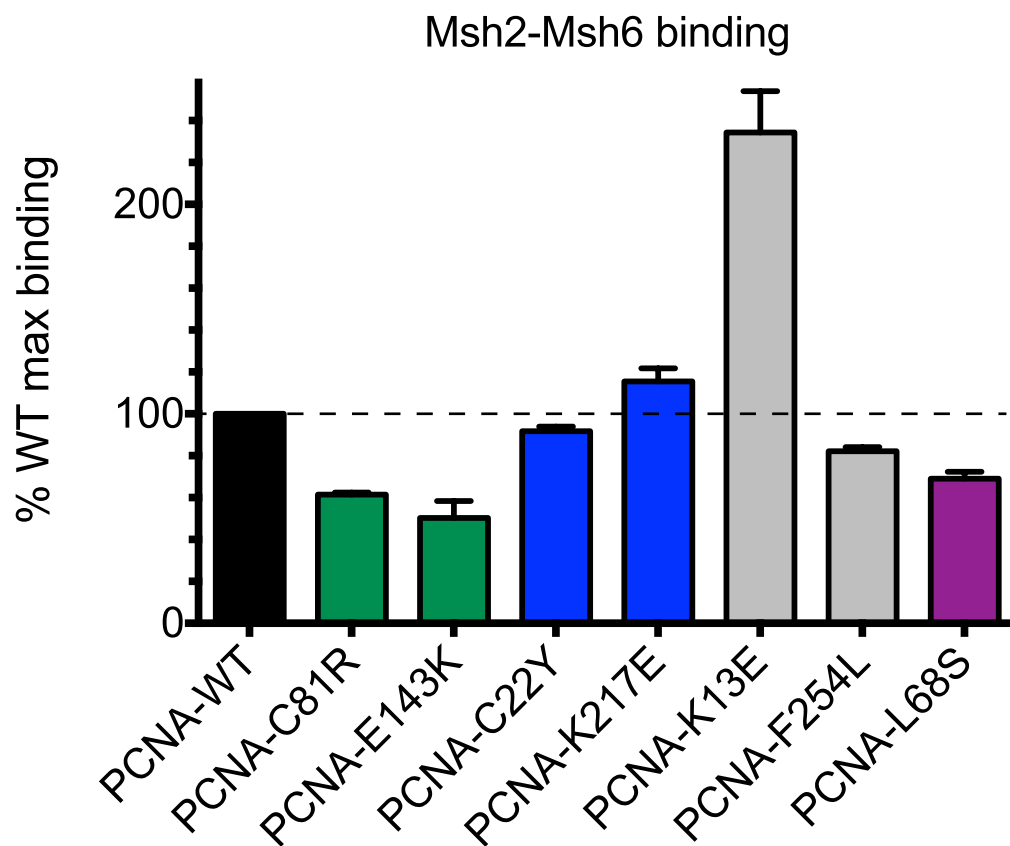

## Supplemental Figure 4

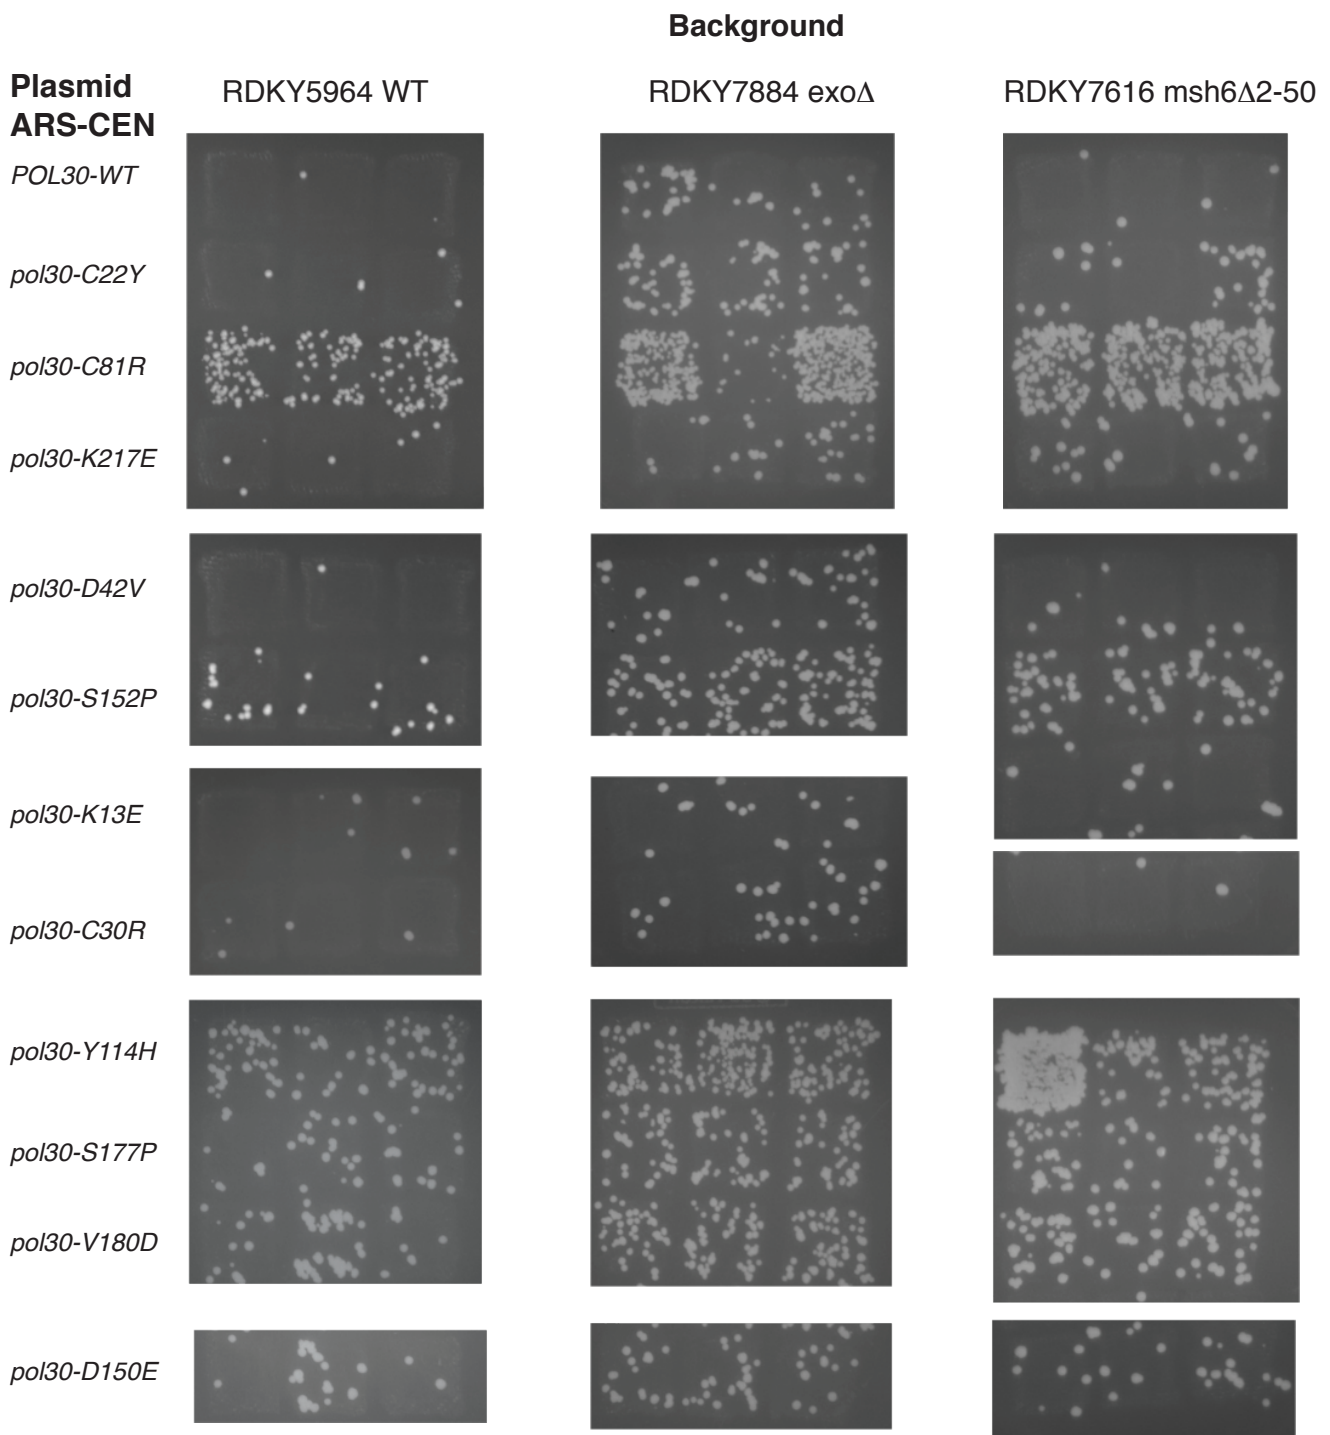

# Supplemental Figure 5

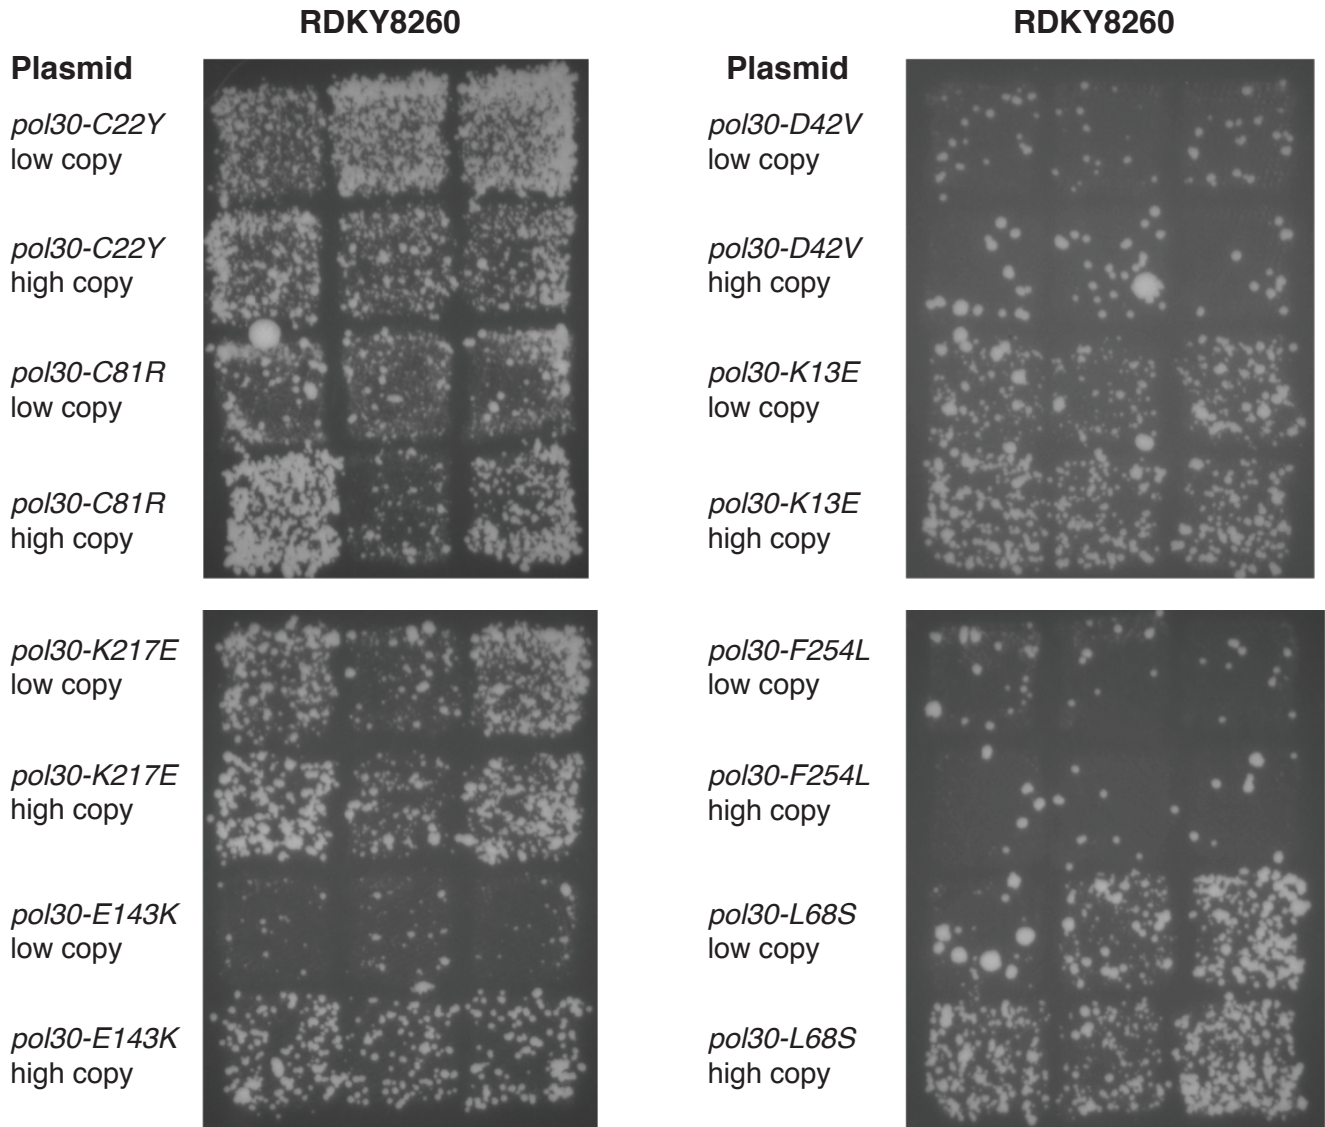

## Supplemental Figure legends

### **Figure S1. *pol30* mutations that disrupt Exo1-independent MMR cause amino acid changes that form clusters on the PCNA crystal structure.**

Altered amino acids for the trimer interface mutations (A), the C22-cluster mutations (B), the IDCL-adjacent mutations (C) and the unclustered mutations (D) are depicted as red circles on a diagram of the secondary structure of a PCNA monomer (modified from (Krishna et al., 1994)).

Relates to Figure 1.

### **Figure S2. Temperature sensitivity of *pol30* mutation containing strains.**

A series of 5 fold serial dilutions for strains containing the indicated *pol30* mutation integrated at the genomic locus is shown. Plates were incubated for 3-6 days at the either 37°C, 30°C, 25°C or 16°C. *pol30-104*, shown here for comparison, was isolated previously and shown to be a cold sensitive allele with cell-cycle defects (Lau et al., 2002). Relates to Table 1.

### **Figure S3. PCNA mutants show altered interactions with Msh2-Msh6.**

The binding of Msh2-Msh6 to bound wild-type and mutant PCNAs was evaluated by surface plasmon resonance in at least 3 independent experiments as shown in Figure 2. The extent of maximal binding to each mutant PCNA (binding at 100 s post Msh2-Msh6 injection) was normalized to binding to wild-type PCNA (set at 100%) observed in the same experiment using the same chip and the average binding (+/- standard deviation) is presented. Mutants are color-coded according to their grouping on the PCNA crystal structure (blue- C22Y-cluster, green-trimer interface, purple- IDCL-adjacent, grey- ungrouped). Relates to Figure 2.

**Figure S4. *pol30* trimer interface mutations result in a dominant mutator phenotype when present on a low copy plasmid**

Patch tests of the *lys2::InsE-A10* frameshift reversion assay for *pol30* mutations introduced on a low copy ARS-CEN plasmid into the indicated strain backgrounds, all containing a wild-type copy of *POL30* at the genomic locus. Relates to Table 2.

**Figure S5. Overexpression of *pol30* mutations on a high copy plasmid does not rescue the mutator phenotype.**

Patch tests for the *lys2::InsE-A10* frameshift reversion assay for RDKY8260 in which the wild-type copy of *POL30* was eliminated by plasmid shuffle and the indicated *pol30* mutation was introduced on either a low copy ARS-CEN plasmid or a high copy 2 $\mu$  plasmid. Relates to Table 2.

**Table S1.** *S. cerevisiae* strains used in this study. Relates to Table 1.

| <b>Name</b> | <b>Genotype</b>                                                                         | <b>Reference</b>        |
|-------------|-----------------------------------------------------------------------------------------|-------------------------|
| RDKY4080    | <i>MATa ura3-52 leu2Δ1 trpΔ63 his3Δ200 hom3-10 lys2ΔBgl ade2Δ1 ade8 pol30-104::LEU2</i> | (Lau et al., 2002)      |
| RDKY7616    | <i>MATa ura3-52 leu2Δ1 trpΔ63 his3Δ200 hom3-10 lys2::InsE-A10 msh3::HIS3 msh6Δ2-50</i>  | This study              |
| RDKY5964    | <i>MATa ura3-52 leu2Δ1 trpΔ63 his3Δ200 hom3-10 lys2::InsE-A10</i>                       | (Hombauer et al., 2011) |
| RDKY7884    | <i>RDKY5964 exo1::hphNT1</i>                                                            | This study              |
| RDKY8260    | <i>RDKY5964 exo1::hphNT1 pol30::HIS3 [pRDK900, POL30]</i>                               | This study              |
| RDKY8071    | <i>RDKY5964 pol30-201::LEU2</i>                                                         | This study              |
| RDKY8073    | <i>RDKY5964 pol30-201::LEU2 exo1::hphNT1</i>                                            | This study              |
| RDKY8075    | <i>RDKY5964 pol30-K217E::LEU2</i>                                                       | This study              |
| RDKY8077    | <i>RDKY5964 pol30-K217E::LEU2 exo1::hphNT1</i>                                          | This study              |
| RDKY8079    | <i>RDKY5964 pol30-D42V::LEU2</i>                                                        | This study              |
| RDKY8081    | <i>RDKY5964 pol30-D42V::LEU2 exo1::hphNT1</i>                                           | This study              |
| RDKY8083    | <i>RDKY5964 pol30-K13E::LEU2</i>                                                        | This study              |
| RDKY8085    | <i>RDKY5964 pol30-K13E::LEU2 exo1::hphNT1</i>                                           | This study              |
| RDKY8087    | <i>RDKY5964 pol30-F254L::LEU2</i>                                                       | This study              |
| RDKY8089    | <i>RDKY5964 pol30-F254L::LEU2 exo1::hphNT1</i>                                          | This study              |
| RDKY8091    | <i>RDKY5964 pol30-204::LEU2</i>                                                         | This study              |
| RDKY8093    | <i>RDKY5964 pol30-204::LEU2 exo1::hphNT1</i>                                            | This study              |
| RDKY8095    | <i>RDKY5964 pol30-E143K::LEU2</i>                                                       | This study              |
| RDKY8097    | <i>RDKY5964 pol30-E143K::LEU2 exo1::hphNT1</i>                                          | This study              |
| RDKY8099    | <i>RDKY5964 pol30-S152P::LEU2</i>                                                       | This study              |
| RDKY8101    | <i>RDKY5964 pol30-S152P::LEU2 exo1::hphNT1</i>                                          | This study              |
| RDKY8103    | <i>RDKY5964 pol30-D150E::LEU2</i>                                                       | This study              |
| RDKY8105    | <i>RDKY5964 pol30-D150E::LEU2 exo1::hphNT1</i>                                          | This study              |
| RDKY8107    | <i>RDKY5964 pol30-V180D::LEU2</i>                                                       | This study              |
| RDKY8109    | <i>RDKY5964 pol30-V180D::LEU2 exo1::hphNT1</i>                                          | This study              |
| RDKY8111    | <i>RDKY5964 pol30-L68S::LEU2</i>                                                        | This study              |
| RDKY8113    | <i>RDKY5964 pol30-L68S::LEU2 exo1::hphNT1</i>                                           | This study              |
| RDKY8115    | <i>RDKY5964 pol30-C30R::LEU2</i>                                                        | This study              |
| RDKY8117    | <i>RDKY5964 pol30-C30R::LEU2 exo1::hphNT1</i>                                           | This study              |
| RDKY7588    | <i>RDKY5964 PMS1-4GFP::KanMX6</i>                                                       | (Hombauer et al., 2011) |
| RDKY7936    | <i>RDKY5964 PMS1-4GFP::KanMX6 pol30-201::LEU2</i>                                       | This study              |
| RDKY8234    | <i>RDKY5964 PMS1-4GFP::KanMX6 pol30-K217E::LEU2</i>                                     | This study              |
| RDKY8236    | <i>RDKY5964 PMS1-4GFP::KanMX6 pol30-D42V::LEU2</i>                                      | This study              |
| RDKY8238    | <i>RDKY5964 PMS1-4GFP::KanMX6 pol30-K13E::LEU2</i>                                      | This study              |
| RDKY8240    | <i>RDKY5964 PMS1-4GFP::KanMX6 pol30-F254L::LEU2</i>                                     | This study              |
| RDKY7938    | <i>RDKY5964 PMS1-4GFP::KanMX6 pol30-204::LEU2</i>                                       | This study              |
| RDKY7940    | <i>RDKY5964 PMS1-4GFP::KanMX6 pol30-E143K::LEU2</i>                                     | This study              |
| RDKY8246    | <i>RDKY5964 PMS1-4GFP::KanMX6 pol30-L68S::LEU2</i>                                      | This study              |
| RKDY8248    | <i>RDKY5964 msh3::HIS3 msh6Δ2-50</i>                                                    | This study              |
| RDKY8249    | <i>RDKY5964 msh3::HIS3 msh6Δ2-50 pol30-K217E::LEU2</i>                                  | This study              |
| RDKY8251    | <i>RDKY5964 msh3::HIS3 msh6Δ2-50 pol30-K13E::LEU2</i>                                   | This study              |
| RDKY8253    | <i>RDKY5964 msh3::HIS3 msh6Δ2-50 pol30-E143K::LEU2</i>                                  | This study              |
| RDKY8255    | <i>RDKY5964 msh3::HIS3 msh6Δ2-50 pol30-F254L::LEU2</i>                                  | This study              |
| RDKY8256    | <i>RDKY5964 msh3::HIS3 msh6Δ2-50 pol30-L68S::LEU2</i>                                   | This study              |
| RDKY8258    | <i>RDKY5964 msh3::HIS3 msh6Δ2-50 pol30-S152P::LEU2</i>                                  | This study              |
| RDKY8263    | <i>RDKY5964 msh2::HIS3</i>                                                              | This study              |
| RDKY8265    | <i>RDKY5964 exo1::hphNT1 msh2::HIS3</i>                                                 | This study              |
| RDKY8267    | <i>RDKY5964 pol30-K217E::LEU2 msh2::HIS3</i>                                            | This study              |



|         |                                             |            |
|---------|---------------------------------------------|------------|
| RDY8269 | RDY5964 <i>pol30-K13E::LEU2 msh2::HIS3</i>  | This study |
| RDY8271 | RDY5964 <i>pol30-E143K::LEU2 msh2::HIS3</i> | This study |
| RDY8273 | RDY5964 <i>pol30-F254L::LEU2 msh2::HIS3</i> | This study |
| RDY8275 | RDY5964 <i>pol30-L68S::LEU2 msh2::HIS3</i>  | This study |
| RDY8277 | RDY5964 <i>pol30-S152P::LEU2 msh2::HIS3</i> | This study |
| RDY8279 | RDY5964 <i>pol30-D42V::LEU2 msh2::HIS3</i>  | This study |

**Table S2.** Plasmids used in this study. Relates to Table 1.

| <b>Name</b> | <b>Relevant Genotype</b>                                      | <b>Reference</b>            |
|-------------|---------------------------------------------------------------|-----------------------------|
| pRDK833     | <i>amp<sup>r</sup> ori 2u TRP POL30</i>                       | (Lau et al., 2002)          |
| pRDK837     | <i>amp<sup>r</sup> CEN6 ARSH4 TRP POL30</i>                   | (Lau et al., 2002)          |
| pRDK900     | <i>amp<sup>r</sup> CEN6 ARSH4 URA3 POL30</i>                  | (Lau et al., 2002)          |
| pRDK902     | <i>amp<sup>r</sup> CEN6 ARSH4 TRP POL30::LEU2</i>             | (Lau et al., 2002)          |
| pRDK930     | <i>amp<sup>r</sup> PT7 POL30</i>                              | (Lau et al., 2002)          |
| pRS315      | <i>amp<sup>r</sup> CEN6 ARSH4 LEU2</i>                        | (Sikorski and Hieter, 1989) |
| pRDK1020    | <i>amp<sup>r</sup> CEN6 ARSH4 LEU2 EXO1</i>                   | (Wei et al., 2003)          |
| pRDK1710    | <i>amp<sup>r</sup> CEN6 ARSH4 TRP pol30-K13E, L50S, F144L</i> | This study                  |
| pRDK1711    | <i>amp<sup>r</sup> CEN6 ARSH4 TRP pol30-K13E</i>              | This study                  |
| pRDK1712    | <i>amp<sup>r</sup> CEN6 ARSH4 TRP pol30-C22Y, D93G</i>        | This study                  |
| pRDK906     | <i>amp<sup>r</sup> CEN6 ARSH4 TRP pol30-C22Y</i>              | (Lau et al., 2002)          |
| pRDK1714    | <i>amp<sup>r</sup> CEN6 ARSH4 TRP pol30-V23A</i>              | This study                  |
| pRDK1715    | <i>amp<sup>r</sup> CEN6 ARSH4 TRP pol30-C30R</i>              | This study                  |
| pRDK1716    | <i>amp<sup>r</sup> CEN6 ARSH4 TRP pol30-D42V</i>              | This study                  |
| pRDK1717    | <i>amp<sup>r</sup> CEN6 ARSH4 TRP pol30-S49P</i>              | This study                  |
| pRDK1718    | <i>amp<sup>r</sup> CEN6 ARSH4 TRP pol30-L50S</i>              | This study                  |
| pRDK1719    | <i>amp<sup>r</sup> CEN6 ARSH4 TRP pol30-L68S, S145P</i>       | This study                  |
| pRDK1720    | <i>amp<sup>r</sup> CEN6 ARSH4 TRP pol30-L68S</i>              | This study                  |
| pRDK1721    | <i>amp<sup>r</sup> CEN6 ARSH4 TRP pol30-T73I, V180D</i>       | This study                  |
| pRDK1722    | <i>amp<sup>r</sup> CEN6 ARSH4 TRP pol30-T73I</i>              | This study                  |
| pRDK909     | <i>amp<sup>r</sup> CEN6 ARSH4 TRP pol30-C81R</i>              | (Lau et al., 2002)          |
| pRDK1724    | <i>amp<sup>r</sup> CEN6 ARSH4 TRP pol30-D93G</i>              | This study                  |
| pRDK1725    | <i>amp<sup>r</sup> CEN6 ARSH4 TRP pol30-Y114H</i>             | This study                  |
| pRDK1726    | <i>amp<sup>r</sup> CEN6 ARSH4 TRP pol30-D120V, K217E</i>      | This study                  |
| pRDK1727    | <i>amp<sup>r</sup> CEN6 ARSH4 TRP pol30-D120V</i>             | This study                  |
| pRDK1728    | <i>amp<sup>r</sup> CEN6 ARSH4 TRP pol30-D134G, D150E</i>      | This study                  |
| pRDK1729    | <i>amp<sup>r</sup> CEN6 ARSH4 TRP pol30-D134G</i>             | This study                  |
| pRDK1730    | <i>amp<sup>r</sup> CEN6 ARSH4 TRP pol30-E143K</i>             | This study                  |
| pRDK1731    | <i>amp<sup>r</sup> CEN6 ARSH4 TRP pol30-F144L</i>             | This study                  |
| pRDK1732    | <i>amp<sup>r</sup> CEN6 ARSH4 TRP pol30-S145P</i>             | This study                  |
| pRDK1733    | <i>amp<sup>r</sup> CEN6 ARSH4 TRP pol30-D150E</i>             | This study                  |
| pRDK1734    | <i>amp<sup>r</sup> CEN6 ARSH4 TRP pol30-S152P</i>             | This study                  |
| pRDK1735    | <i>amp<sup>r</sup> CEN6 ARSH4 TRP pol30-S177P</i>             | This study                  |
| pRDK1736    | <i>amp<sup>r</sup> CEN6 ARSH4 TRP pol30-V180D</i>             | This study                  |
| pRDK1737    | <i>amp<sup>r</sup> CEN6 ARSH4 TRP pol30-I181V, F254L</i>      | This study                  |
| pRDK1738    | <i>amp<sup>r</sup> CEN6 ARSH4 TRP pol30-I181V</i>             | This study                  |
| pRDK1739    | <i>amp<sup>r</sup> CEN6 ARSH4 TRP pol30-F207S, K217E</i>      | This study                  |
| pRDK1740    | <i>amp<sup>r</sup> CEN6 ARSH4 TRP pol30-K217E</i>             | This study                  |
| pRDK1741    | <i>amp<sup>r</sup> CEN6 ARSH4 TRP pol30-S222P</i>             | This study                  |
| pRDK1742    | <i>amp<sup>r</sup> CEN6 ARSH4 TRP pol30-F254L</i>             | This study                  |
| pRDK925     | <i>amp<sup>r</sup> CEN6 ARSH4 TRP pol30-C22Y::LEU2</i>        | (Lau et al., 2002)          |
| pRDK1744    | <i>amp<sup>r</sup> CEN6 ARSH4 TRP pol30-K217E::LEU2</i>       | This study                  |
| pRDK1745    | <i>amp<sup>r</sup> CEN6 ARSH4 TRP pol30-D42V::LEU2</i>        | This study                  |
| pRDK1746    | <i>amp<sup>r</sup> CEN6 ARSH4 TRP pol30-K13E::LEU2</i>        | This study                  |
| pRDK1747    | <i>amp<sup>r</sup> CEN6 ARSH4 TRP pol30-F254L::LEU2</i>       | This study                  |
| pRDK926     | <i>amp<sup>r</sup> CEN6 ARSH4 TRP pol30-C81R::LEU2</i>        | (Lau et al., 2002)          |
| pRDK1749    | <i>amp<sup>r</sup> CEN6 ARSH4 TRP pol30-E143K::LEU2</i>       | This study                  |
| pRDK1750    | <i>amp<sup>r</sup> CEN6 ARSH4 TRP pol30-S152P::LEU2</i>       | This study                  |
| pRDK1751    | <i>amp<sup>r</sup> CEN6 ARSH4 TRP pol30-D150E::LEU2</i>       | This study                  |
| pRDK1752    | <i>amp<sup>r</sup> CEN6 ARSH4 TRP pol30-V180D::LEU2</i>       | This study                  |

|          |                                                              |                    |
|----------|--------------------------------------------------------------|--------------------|
| pRDK1753 | <i>amp<sup>r</sup> CEN6 ARSH4 TRP pol30-L68S::LEU2</i>       | This study         |
| pRDK1754 | <i>amp<sup>r</sup> CEN6 ARSH4 TRP pol30-C30R::LEU2</i>       | This study         |
| pRDK1755 | <i>amp<sup>r</sup> ori 2<math>\mu</math> TRP pol30-C22Y</i>  | This study         |
| pRDK1756 | <i>amp<sup>r</sup> ori 2<math>\mu</math> TRP pol30-C81R</i>  | This study         |
| pRDK1757 | <i>amp<sup>r</sup> ori 2<math>\mu</math> TRP pol30-K13E</i>  | This study         |
| pRDK1758 | <i>amp<sup>r</sup> ori 2<math>\mu</math> TRP pol30-D42V</i>  | This study         |
| pRDK1759 | <i>amp<sup>r</sup> ori 2<math>\mu</math> TRP pol30-E143K</i> | This study         |
| pRDK1760 | <i>amp<sup>r</sup> ori 2<math>\mu</math> TRP pol30-F254L</i> | This study         |
| pRDK1761 | <i>amp<sup>r</sup> ori 2<math>\mu</math> TRP pol30-L68S</i>  | This study         |
| pRDK1762 | <i>amp<sup>r</sup> ori 2<math>\mu</math> TRP pol30-K217E</i> | This study         |
| pRDK931  | <i>amp<sup>r</sup> PT7 pol30-C22Y</i>                        | (Lau et al., 2002) |
| pRDK932  | <i>amp<sup>r</sup> PT7 pol30-C81R</i>                        | (Lau et al., 2002) |
| pRDK1763 | <i>amp<sup>r</sup> PT7 pol30-K217E</i>                       | This study         |
| pRDK1764 | <i>amp<sup>r</sup> PT7 pol30-E143K</i>                       | This study         |
| pRDK1765 | <i>amp<sup>r</sup> PT7 pol30-K13E</i>                        | This study         |
| pRDK1766 | <i>amp<sup>r</sup> PT7 pol30-L68S</i>                        | This study         |
| pRDK1767 | <i>amp<sup>r</sup> PT7 pol30-F254L</i>                       | This study         |
